# Supplementary material for: Cryoelectron Microscopy Structures of AdeB Illuminate Mechanisms of Simultaneous Binding and Exporting of Substrates
Source: PubMed Central journal article supplement (PMC8545137; doi:10.1128/mbio.03690-20), 2021-02-23
Supplement: mbio.03690-20-sf001.pdf [file mbio.03690-20-sf001.pdf]

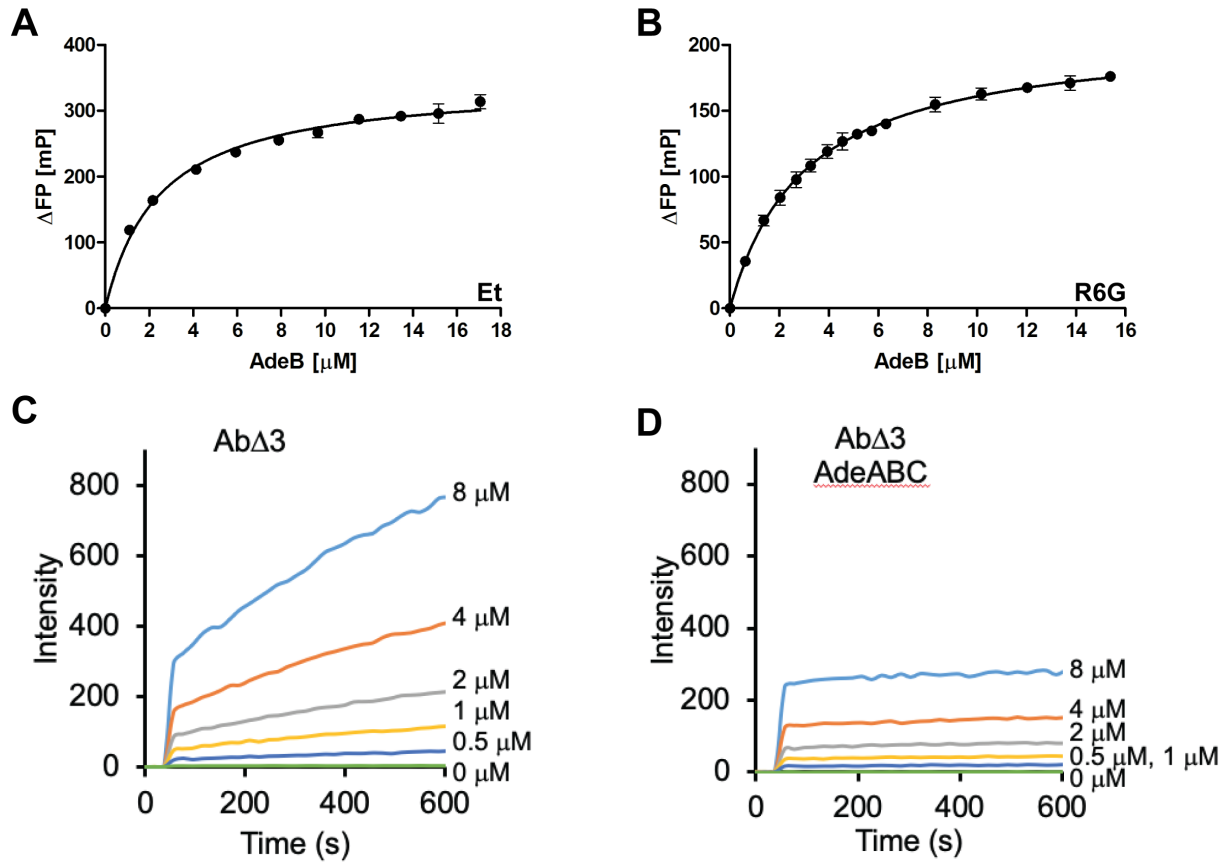

**Figure S1. AdeB and Ethidium interactions.** (A) Fluorescence polarization (FP) assay shows Et binds to AdeB with an affinity of  $2.5 \pm 0.1 \mu M$ . (B) FP shows R6G binds AdeB with an affinity of  $3.1 \pm 0.1 \mu M$ . (C) Kinetics of intracellular accumulation of Et in the *A. baumannii* *Ab $\Delta 3$*  cells lacking the AdeABC, AdeIJK and AdeFGH efflux pumps. Et accumulates inside of cells with all three pump systems are knocked out (green, 0  $\mu M$  Et; blue, 0.5  $\mu M$  Et; yellow, 1  $\mu M$  Et; gray, 2  $\mu M$  Et; red, 4  $\mu M$  Et; and cyan, 8  $\mu M$  Et). (D) Complementing triple knockout cells with AdeABC restores extrusion and halts accumulation of Et inside of cells (green, 0  $\mu M$  Et; blue, 0.5  $\mu M$  Et; yellow, 1  $\mu M$  Et; gray, 2  $\mu M$  Et; red, 4  $\mu M$  Et; and cyan, 8  $\mu M$  Et).
