# Supplementary material for: Cryoelectron Microscopy Structures of AdeB Illuminate Mechanisms of Simultaneous Binding and Exporting of Substrates
Source: PubMed Central journal article supplement (PMC8545137; doi:10.1128/mbio.03690-20), 2021-02-23
Supplement: mbio.03690-20-sf006.pdf [file mbio.03690-20-sf006.pdf]

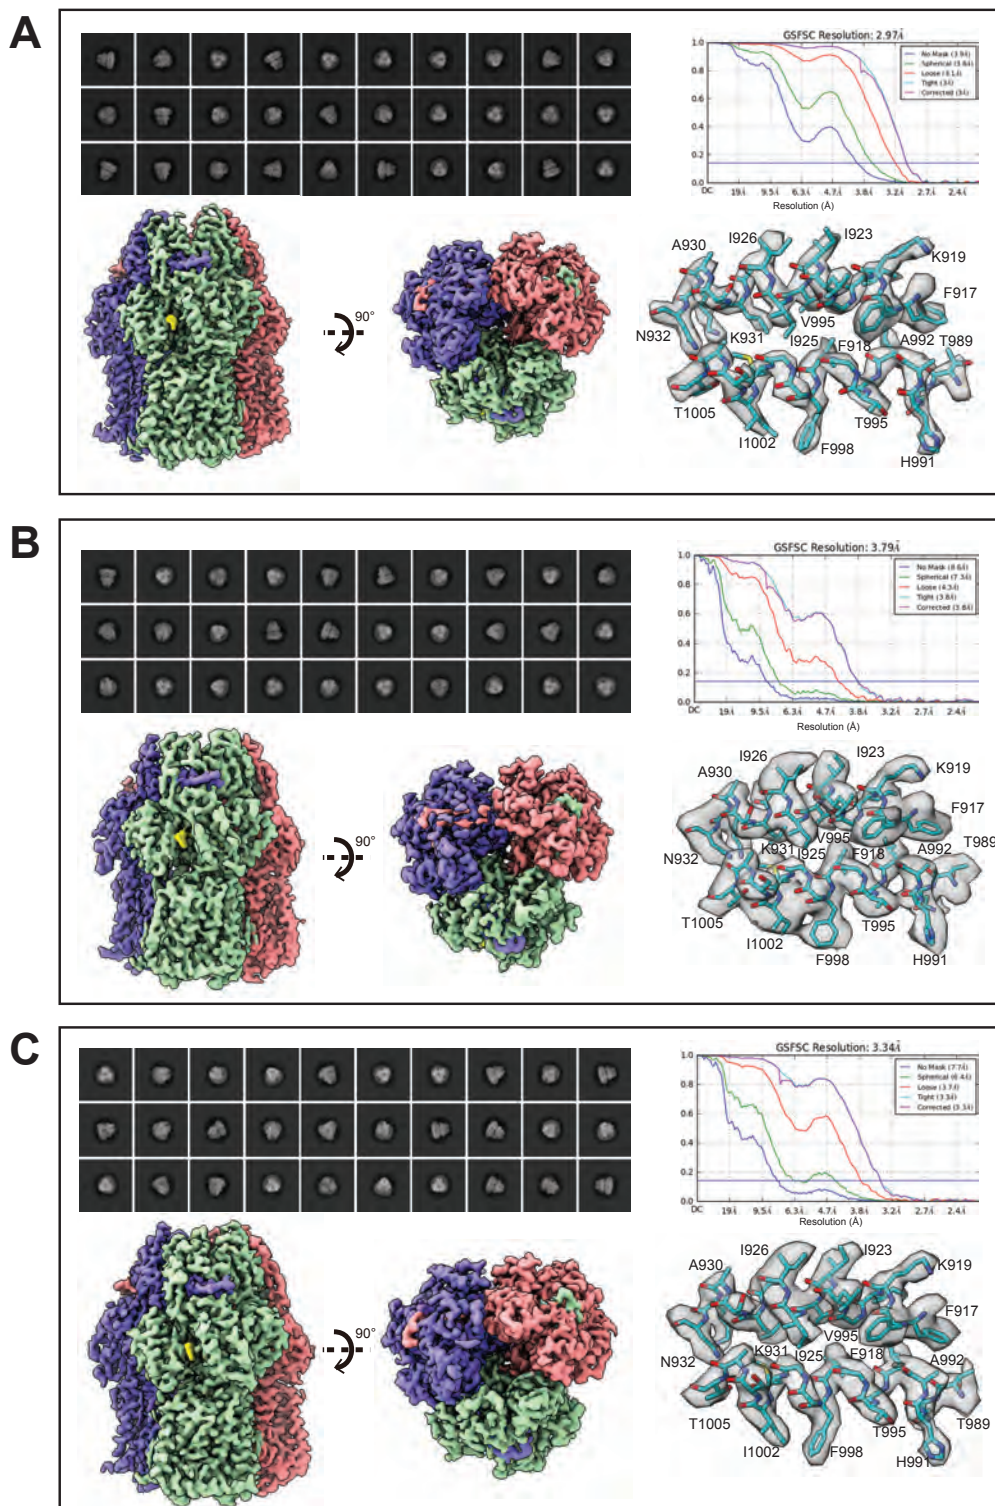

**Figure S6. Cryo-EM analysis of AdeB-Et.** (A) AdeB-Et-I cryo-EM results. (B) AdeB-Et-II cryo-EM results. (C) AdeB-Et-III cryo-EM results. Panels depict representative 2D classes (top left), GS-FSC resolution curve (top right), final cryo-EM map (bottom left) and representative density (bottom right) for each structure. Amino acids are represented as cyan sticks.
