# Supplementary material for: Cryoelectron Microscopy Structures of AdeB Illuminate Mechanisms of Simultaneous Binding and Exporting of Substrates
Source: PubMed Central journal article supplement (PMC8545137; doi:10.1128/mbio.03690-20), 2021-02-23
Supplement: mbio.03690-20-st001.pdf [file mbio.03690-20-st001.pdf]

**Table S1. Cryo-EM data collection and refinement statistics.**

| <b>Data collection</b>                                   |               |                |                 |                  |                   |                    |
|----------------------------------------------------------|---------------|----------------|-----------------|------------------|-------------------|--------------------|
| Magnification                                            | 81,000        |                |                 |                  |                   |                    |
| Voltage (kV)                                             | 300           |                |                 |                  |                   |                    |
| Electron Microscope                                      | Krios-GIF-K3  |                |                 |                  |                   |                    |
| Defocus (um)                                             | -1.0 to -2.0  |                |                 |                  |                   |                    |
| Total exposure time (s)                                  | 2.6           |                |                 |                  |                   |                    |
| Energy filter width (eV)                                 | 20            |                |                 |                  |                   |                    |
| Pixel size (Å)                                           | 1.08 (0.54)   |                |                 |                  |                   |                    |
| Total dose (e <sup>-</sup> / Å <sup>2</sup> )            | 40            |                |                 |                  |                   |                    |
| Number of frames                                         | 40            |                |                 |                  |                   |                    |
| Does rate (e <sup>-</sup> / Å <sup>2</sup> /phys. Pixel) | 18.02         |                |                 |                  |                   |                    |
| Number of micrographs                                    | 5,669         |                |                 |                  |                   |                    |
| Initial particle images (no.)                            | 2,188,223     |                |                 |                  |                   |                    |
| Final particle images (no.)                              | 982,491       |                |                 |                  |                   |                    |
| <b>Refinement</b>                                        | <b>AdeB-I</b> | <b>AdeB-II</b> | <b>AdeB-III</b> | <b>AdeB-Et-I</b> | <b>AdeB-Et-II</b> | <b>AdeB-Et-III</b> |
| Total Particles (no.)                                    | 16,223        | 95,552         | 25,060          | 93,835           | 10,137            | 9,781              |
| GS-FSC Resolution (0.143, Å)                             | 3.64          | 3.21           | 3.42            | 2.97             | 3.79              | 3.34               |
| FSC-model Resolution after Density Modification (0.5, Å) | 3.59          | 3.13           | 3.27            | 2.96             | 3.55              | 3.21               |
| Symmetry                                                 | C3            | C1             | C3              | C1               | C1                | C1                 |
| <u>Model composition</u>                                 |               |                |                 |                  |                   |                    |
| Protein residues                                         | 3,060         | 3,060          | 3,060           | 3,060            | 3,060             | 3,060              |
| Ligands                                                  | 6             | 3              | 0               | 9                | 5                 | 6                  |
| <u>RMSD</u>                                              |               |                |                 |                  |                   |                    |
| Bond lengths (Å)                                         | 0.006         | 0.005          | 0.006           | 0.006            | 0.005             | 0.005              |
| Bond angles (°)                                          | 1.222         | 1.058          | 1.110           | 1.115            | 1.079             | 1.065              |
| <b>Validation</b>                                        | <b>AdeB-I</b> | <b>AdeB-II</b> | <b>AdeB-III</b> | <b>AdeB-Et-I</b> | <b>AdeB-Et-II</b> | <b>AdeB-Et-III</b> |
| MolProbity score                                         | 1.70          | 1.37           | 1.59            | 1.25             | 1.49              | 1.40               |
| Clash score                                              | 9.40          | 6.66           | 9.04            | 4.37             | 9.15              | 7.35               |
| <u>Ramachandran plot</u>                                 |               |                |                 |                  |                   |                    |
| Favored (%)                                              | 97.87         | 98.56          | 97.44           | 99.05            | 98.26             | 98.06              |
| Allowed (%)                                              | 2.13          | 1.44           | 2.56            | 0.95             | 1.74              | 1.94               |
| Disallowed (%)                                           | 0.00          | 0.00           | 0.06            | 0.00             | 0.00              | 0.00               |
| CC Mask                                                  | 0.71          | 0.79           | 0.74            | 0.82             | 0.72              | 0.78               |
