# Supplementary material for: Cryoelectron Microscopy Structures of AdeB Illuminate Mechanisms of Simultaneous Binding and Exporting of Substrates
Source: PubMed Central journal article supplement (PMC8545137; doi:10.1128/mbio.03690-20), 2021-02-23
Supplement: mbio.03690-20-st002.pdf [file mbio.03690-20-st002.pdf]

**Table S2. Different transient states of the AdeB protomers.**

| Protomer       | Cleft State | Exit site distance, Q125 to Y749 | Hydrogen-bonded distance, K931 to |          |          |          | Protomer Assignment |
|----------------|-------------|----------------------------------|-----------------------------------|----------|----------|----------|---------------------|
|                |             |                                  | D407 (Å)                          | D408 (Å) | N932 (Å) | T968 (Å) |                     |
| AdeB-I, A      | Closed      | 13.04                            | -                                 | -        | 3.00     | 3.15     | Extrusion           |
| AdeB-I, B      | Closed      | 13.04                            | -                                 | -        | 3.00     | 3.15     | Extrusion           |
| AdeB-I, C      | Closed      | 13.04                            | -                                 | -        | 3.00     | 3.15     | Extrusion           |
| AdeB-II, A     | Closed      | 13.53                            | -                                 | -        | 3.12     | 3.17     | Extrusion           |
| AdeB-II, B     | Closed      | 14.89                            | -                                 | -        | 3.03     | 3.04     | Extrusion           |
| AdeB-II, C     | Closed      | 13.99                            | -                                 | -        | 3.15     | 3.00     | Extrusion           |
| AdeB-III, A    | Closed      | 14.24                            | -                                 | -        | 3.20     | 3.01     | Extrusion           |
| AdeB-III, B    | Closed      | 14.24                            | -                                 | -        | 3.20     | 3.01     | Extrusion           |
| AdeB-III, C    | Closed      | 14.24                            | -                                 | -        | 3.20     | 3.01     | Extrusion           |
| AdeB-Et-I, A   | Closed      | 13.87                            | -                                 | -        | 3.17     | 2.86     | Extrusion           |
| AdeB-Et-I, B   | Closed      | 14.01                            | -                                 | -        | 3.03     | 3.18     | Extrusion           |
| AdeB-Et-I, C   | Open        | 9.40                             | 2.75                              | 2.85     | -        | -        | Binding             |
| AdeB-Et-II, A  | Closed      | 9.19                             | -                                 | -        | 3.08     | 2.82     | Resting             |
| AdeB-Et-II, B  | Closed      | 15.25                            | -                                 | -        | 2.79     | 2.71     | Extrusion           |
| AdeB-Et-II, C  | Open        | 9.01                             | 3.12                              | 2.67     | -        | -        | Binding             |
| AdeB-Et-III, A | Open        | 9.38                             | 2.95                              | -        | -        | -        | Access*             |
| AdeB-Et-III, B | Closed      | 14.71                            | -                                 | -        | 2.62     | 2.99     | Extrusion           |
| AdeB-Et-III, C | Open        | 8.50                             | 2.93                              | 2.97     | -        | -        | Binding             |

Protomer states were defined using three criteria. (1) State of the periplasmic cleft between PC1 and PC2. (2) Size of the extrusion tunnel measured by the distance between the C $\alpha$  atoms of Q125 and Y749, which form the substrate exit site. (3) Hydrogen-bonded distance between the “proton sweeper” K931 and other residues within the proton-relay network (D407, D408, N932 or T968). Only distances of 3.20 Å and under are noted.
